# Supplementary material for: Low-energy sweeteners and body weight: a citation network analysis
Source: HighWire-hosted journal article supplement (doi:10.1136/bmjnph-2020-000210), 2021-04-01
Supplement: bmjnph-2020-000210supp001_data_supplement.pdf [file bmjnph-2020-000210supp001_data_supplement.pdf]

### Data extraction: Guiding decision rules

- The conclusion of EAU was scored based on five different options in relation to BW-related outcomes: either “decreasing/more beneficial”, “neutral”, “increasing/less beneficial”, “no conclusion directly relevant to the LES-BW relationship”, “evidence is insufficient to draw a conclusion (author’s view)”, or “Unable to draw a conclusion from the paper”.
- If the conclusion of the EAU was not clear (beneficial, neutral or less beneficial) three options were available:
  - No conclusion directly relevant to the LES-BW relationship: This option was used for articles which did not contain any data or information about LES in relation to BW
  - Evidence is insufficient to draw a conclusion (author’s view): This option was used if the authors concluded that more studies were needed, before they were able to draw a conclusion about LES in relation to BW
  - Unable to draw a conclusion from the paper: This option were used if the article did contain information relevant to the relationship between LES and BW, but it was not possible to conclude based on the information available, e.g. if no clear statistical analysis or conclusions were provided in relation to LES and BW or if evidence were conflicting.
- When intervention studies used LES in a combination, these were judged based on the intervention that contained LES.
- Unfortunately a few EAU had missing data e.g. if the article was not accessible or the journal no longer existed.
