# Supplementary material for: Low-energy sweeteners and body weight: a citation network analysis
Source: PubMed Central journal article supplement — BMJ Nutr Prev Health. 2021 Apr 1;4(1):319–32. doi: 10.1136/bmjnph-2020-000210 (PMC8258071; doi:10.1136/bmjnph-2020-000210), 2021-04-01
Supplement: bmjnph-2020-000210supp002.pdf [file bmjnph-2020-000210supp002.pdf]

## Supplementary tables

Table S1: Overview of search terms

| <b>Exposure</b>               | <b>Outcome</b> | <b>Type of publication</b> |
|-------------------------------|----------------|----------------------------|
| AND                           | AND            |                            |
| High(-)intensity sweetener(s) | Body weight    | Narrative review           |
| High(-)potency sweetener(s)   | Obesity        | Systematic review          |
| Intense sweetener(s)          | Overweight     | Mini-review                |
| Artificial sweetener(s)       | Adiposity      | Review                     |
| Low(-)calorie sweetener(s)    |                | Commentary                 |
| Low(-)caloric sweetener(s)    |                | Opinion                    |
| Low(-)energy sweetener(s)     |                | Perspective                |
| Non-caloric sweetener(s)      |                | Meta-analysis              |
| No(-)calorie sweetener(s)     |                | Meta-analyses              |
| Non-nutritive sweetener(s)    |                | Consensus statement(s)     |
| Sugar(-)free sweetener(s)     |                | Consensus report           |
| Sugar(-)free product(s)       |                | Position statement(s)      |
| Reduced(-)sugar sweetener(s)  |                | Position report            |
| Reduced(-)sugar product(s)    |                | Scientific statement(s)    |
| Sweetening agent(s)           |                | Scientific report          |
| Sugar replacer                |                |                            |

Table S2: Inclusion and exclusion criteria

| <b>Inclusion criteria</b>                                                                                                  | <b>Exclusion criteria</b>                                                                                                                                               |
|----------------------------------------------------------------------------------------------------------------------------|-------------------------------------------------------------------------------------------------------------------------------------------------------------------------|
| The effect or association of LES (primarily intense sweeteners) with BW regulation                                         | Publications reviewing lower-energy sugars, polyols or other food ingredients                                                                                           |
| The publication has to include an assessment of evidence on the relationship between LES and BW as a significant component | Publications which incidentally refer to LES and BW relationships, without reviewing the evidence                                                                       |
| The publication has to include LES in general and not specific types of LES                                                | Publication focused on one specific LES or one specific category of LES                                                                                                 |
| The publication has to be either a narrative or systematic review or position or consensus statement                       | All primary studies; animal studies as well as human studies (observational or intervention), letters to editors, brief commentaries, conference abstracts or summaries |
|                                                                                                                            | Publications focused on pregnancy and fetal outcomes                                                                                                                    |
| The publication has to be published in a refereed journal                                                                  |                                                                                                                                                                         |
| An English version of the full publication has to be assessible                                                            |                                                                                                                                                                         |
| Full text has to be accessible                                                                                             | Publications with data not electronically accessible from the database                                                                                                  |

BW: body weight, LES: low-energy sweetener

Table S3: Article characteristics and subsequent operationalization

| <b>Characteristic</b>                                                                            | <b>Operationalization</b>                                                                                                                                                                                                                                                                                                                                                                      |
|--------------------------------------------------------------------------------------------------|------------------------------------------------------------------------------------------------------------------------------------------------------------------------------------------------------------------------------------------------------------------------------------------------------------------------------------------------------------------------------------------------|
| Article ID                                                                                       | Self-assigned unique ID, consecutive                                                                                                                                                                                                                                                                                                                                                           |
| First author surname                                                                             | Text (used for matching)                                                                                                                                                                                                                                                                                                                                                                       |
| Title                                                                                            | Text (used for matching)                                                                                                                                                                                                                                                                                                                                                                       |
| Publication year                                                                                 | Year (used for matching)                                                                                                                                                                                                                                                                                                                                                                       |
| Study outcome – Reviews<br>Author’s conclusion<br>BW                                             | Effect or association relative to control or no/lower exposure:<br>0 = Decrease/more beneficial<br>1 = Neutral (no directional effect or association)<br>2 = Increase/less beneficial<br>3 = No conclusion directly relevant to the LES-body weight relationship<br>4 = Evidence is insufficient to draw a conclusion (author’s view)<br>5 = We are unable to draw a conclusion from the paper |
| Study outcome – Reviews<br>Statistical significance (only reviews including meta-analysis)<br>BW | 0 = Significant effect - decreasing<br>1 = Not statistically significant effect<br>2 = Significant effect - increasing                                                                                                                                                                                                                                                                         |
| Study outcome – Primary studies<br>Main message<br>BW                                            | Effect or association relative to control or no/lower exposure:<br>0 = Decrease/more beneficial<br>1 = Neutral (no directional effect or association)<br>2 = Increase/less beneficial<br>3 = No conclusion directly relevant to the LES-BW relationship<br>4 = Evidence is insufficient to draw a conclusion (author’s view)<br>5 = We are unable to draw a conclusion from the paper          |
| Article type - Review                                                                            | 0 = Narrative review<br>1 = Systematic review with meta-analysis<br>2 = Systematic review without meta-analysis                                                                                                                                                                                                                                                                                |

BW: body weight, LES: low-energy sweeteners

Table S3: Article characteristics and subsequent operationalization, *continued*

|                                                                                  |                                                                                                                                                                                                                                                                        |
|----------------------------------------------------------------------------------|------------------------------------------------------------------------------------------------------------------------------------------------------------------------------------------------------------------------------------------------------------------------|
| Article type – Primary studies                                                   | 0 = Randomized controlled trial<br>1 = Observational study<br>2 = Animal and/or in vitro study<br>3 = Other<br>4 = Systematic review (systematic search) with meta-analysis<br>5 = Systematic review (systematic search) without meta-analysis<br>6 = Narrative review |
| Population<br>Only human studies                                                 | 0 = Adults<br>1 = Children<br>2 = Both or not specific                                                                                                                                                                                                                 |
| Sample size, only primary studies                                                | Number                                                                                                                                                                                                                                                                 |
| Number of authors                                                                | Number                                                                                                                                                                                                                                                                 |
| Journal impact factor, current                                                   | Number                                                                                                                                                                                                                                                                 |
| Journal impact factor, last five years                                           | Number                                                                                                                                                                                                                                                                 |
| Funding source, only reviews                                                     | 0 = Non-profit organization<br>1 = For profit organization<br>2 = Both profit and non-profit<br>3 = Not stated/Stated as no funding received                                                                                                                           |
| Affiliation of the corresponding author, only reviews                            | 0 = University<br>1 = Government<br>2 = Non-profit organization<br>3 = Industry<br>4 = Other                                                                                                                                                                           |
| Affiliation of the first author, only reviews                                    | 0 = University<br>1 = Government<br>2 = Non-profit organization<br>3 = Industry<br>4 = Other                                                                                                                                                                           |
| Number of relevant cited studies, only reviews                                   | Number                                                                                                                                                                                                                                                                 |
| Number of review authors publications in the section concerning BW, only reviews | Number                                                                                                                                                                                                                                                                 |
| Years since cited paper was published                                            | Number                                                                                                                                                                                                                                                                 |

BW: body weight, LES: low-energy sweeteners

### Adjusted odds ratios for the likelihood of being cited

Table S4: Adjusted odds ratios for the likelihood of being cited (from multivariate analyses of 183 cited articles in 51 evidence assessment units from 33 reviews)

|                                                             | Adjusted OR (CI), NOAU | <i>p</i> | Adjusted OR (CI), JFC | <i>p</i> | Adjusted OR (CI), YESI | <i>p</i> |
|-------------------------------------------------------------|------------------------|----------|-----------------------|----------|------------------------|----------|
| <b>Main message of cited articles</b>                       |                        |          |                       |          |                        |          |
| Neutral (no directional effect or association)              | 1 (ref)                |          | 1 (ref)               |          | 1 (ref)                |          |
| No conclusion directly relevant to the LES- BW relationship | 1.72 (1.00-2.98)       | 0.05     | 1.63 (0.94-2.82)      | 0.08     | 1.64 (0.93-2.88)       | 0.09     |
| Decrease/more beneficial                                    | 1.39 (0.81-2.40)       | 0.23     | 1.26 (0.72-2.21)      | 0.42     | 1.31 (0.76-2.27)       | 0.33     |
| We are unable to draw a conclusion from the article         | 1.25 (0.49-2.82)       | 0.61     | 1.14 (0.45-2.55)      | 0.76     | 1.11 (0.43-2.50)       | 0.81     |
| Evidence is insufficient to draw a conclusion               | 1.19 (0.60-2.27)       | 0.61     | 1.11 (0.56-2.11)      | 0.76     | 1.05 (0.53-2.03)       | 0.88     |
| Increase/less beneficial                                    | 1.17 (0.72-1.95)       | 0.53     | 1.16 (0.71-1.94)      | 0.56     | 1.11 (0.67-1.87)       | 0.69     |
| <b>Cited article type</b>                                   |                        |          |                       |          |                        |          |
| Systematic review with meta-analysis                        | 1 (ref)                |          | 1 (ref)               |          | 1 (ref)                |          |
| Systematic review without meta-analysis                     | 0.97 (0.40-2.22)       | 0.95     | 0.83 (0.35-1.87)      | 0.66     | 0.86 (0.36-1.92)       | 0.72     |
| Randomized controlled trial                                 | 0.85 (0.50-1.52)       | 0.58     | 0.79 (0.45-1.42)      | 0.41     | 0.85 (0.48-1.56)       | 0.59     |
| Observational study                                         | 0.69 (0.40-1.23)       | 0.19     | 0.62 (0.36-1.12)      | 0.10     | 0.67 (0.39-1.19)       | 0.15     |
| Animal                                                      | 0.67 (0.29-1.47)       | 0.33     | 0.66 (0.28-1.45)      | 0.31     | 0.64 (0.28-1.40)       | 0.28     |
| Narrative review                                            | 0.45 (0.18-1.03)       | 0.07     | 0.40 (0.16-0.90)      | 0.03     | 0.39 (0.16-0.87)       | 0.03     |
| Other                                                       | 0.27 (0.00-3.39)       | 0.50     | -                     | -        | 0.22 (0.00-2.68)       | 0.44     |
| <b>Cited article population</b>                             |                        |          |                       |          |                        |          |
| Adults                                                      | 1 (ref)                |          | 1 (ref)               |          | 1 (ref)                |          |
| Children                                                    | 2.28 (1.61-3.24)       | <0.001   | 2.20 (1.54-3.15)      | <0.001   | 2.27 (1.59-3.26)       | <0.001   |
| Both                                                        | 1.05 (0.63-1.70)       | 0.83     | 1.04 (0.62-1.69)      | 0.88     | 1.00 (0.59-1.65)       | 0.99     |
| <b>Sample size</b>                                          | 1.00 (0.83-1.21)       | 0.96     | 0.96 (0.80-1.16)      | 0.68     | 1.00 (0.82-1.21)       | 0.97     |
| <b>Number of authors</b>                                    | -                      | -        | 1.04 (0.99-1.09)      | 0.10     | 1.05 (1.00-1.10)       | 0.06     |
| <b>Journal impact factor</b>                                | 1.14 (0.99-1.30)       | 0.06     | -                     | -        | 1.15 (1.00-1.31)       | 0.04     |
| <b>Journal impact factor, last five years</b>               | 1.12 (0.97-1.28)       | 0.12     | -                     | -        | 1.13 (0.98-1.30)       | 0.08     |
| <b>Years since cited article was published</b>              | 1.00 (0.98-1.02)       | 0.83     | 1.00 (0.98-1.02)      | 0.93     | -                      | -        |

BW; body weight, CI; 95% confidence interval, JFC; Current journal impact factor, LES; low-energy sweetener, NOAU; Number of authors, OR; Odds ratios, *p*; *p*-value, ref; reference variable, YESI; Years since cited study was published. Logistic mixed-effects regression adjusted for number of authors, journal impact factor and years since cited study was published, respectively.

*Post hoc analysis*

Table S5: Subgroup analysis for evidence assessment units (n= 11) showing a beneficial effect or association of LES on BW (n=65 articles cited)

|                                                             | n (%) <sup>1</sup> | OR (95% CI)      | P-value |
|-------------------------------------------------------------|--------------------|------------------|---------|
| <b>Main message of cited articles</b>                       |                    |                  |         |
| Neutral (no directional effect or association)              | 16 (25)            | 1 (ref)          |         |
| No conclusion directly relevant to the LES- BW relationship | 8 (12)             | 1.23 (0.61-2.40) | 0.56    |
| Increase/less beneficial                                    | 9 (14)             | 1.06 (0.53-2.07) | 0.86    |
| Decrease/more beneficial                                    | 18 (28)            | 1.02 (0.58-1.80) | 0.93    |
| Evidence is insufficient to draw a conclusion               | 11 (17)            | 0.90 (0.46-1.73) | 0.76    |
| Unable to draw a conclusion from the article                | 2 (3)              | 0.55 (0.09-2.04) | 0.44    |
| <b>Cited article type</b>                                   |                    |                  |         |
| Systematic review with meta-analysis                        | 8 (12)             | 1 (ref)          |         |
| Systematic review without meta-analysis                     | 4 (6)              | 1.62 (0.66-3.90) | 0.28    |
| Randomized controlled trial                                 | 23 (35)            | 0.91 (0.49-1.80) | 0.79    |
| Observational study                                         | 19 (29)            | 0.82 (0.42-1.64) | 0.56    |
| Narrative review                                            | 8 (12)             | 0.70 (0.29-1.60) | 0.40    |
| Other                                                       | 1 (2)              | 0.49 (0.03-2.84) | 0.51    |
| Animal                                                      | 1 (2)              | 0.49 (0.03-2.84) | 0.51    |
| <b>Cited article population<sup>2</sup></b>                 |                    |                  |         |
| Adults                                                      | 23 (35)            | 1 (ref)          |         |
| Children                                                    | 22 (34)            | 1.38 (0.85-2.26) | 0.19    |
| Both                                                        | 18 (28)            | 1.07 (0.62-1.82) | 0.81    |
| <b>Sample size<sup>3,4</sup></b>                            | 42 (65)            | 0.92 (0.68-1.22) | 0.56    |
| <b>Number of authors</b>                                    | 64 (98)            | 1.01 (0.95-1.07) | 0.86    |
| <b>Journal impact factor, current (2018)<sup>5</sup></b>    | 63 (97)            | 1.01 (0.84-1.20) | 0.9     |
| <b>Journal impact factor, last five years<sup>5</sup></b>   | 63 (97)            | 1.01 (0.84-1.20) | 0.92    |
| <b>Years since cited article was published</b>              | 65 (100)           | 0.97 (0.94-1.00) | 0.09    |

BW; body weight, CI; 95% confidence interval, LES; low-energy sweetener, n; sample size, OR; Odds ratio, ref; reference variable. Logistic mixed-effects regression.

<sup>1</sup>Cited articles can potentially be cited in all evidence assessment units. The aggregated number for subgroups is therefore higher than the total number of cited articles.

<sup>2</sup>Data on population was only extracted for articles considering human subjects.

<sup>3</sup>Data on sample size was only extracted for primary evidence (i.e. not for reviews).

<sup>4</sup>Sample size was base 10 log-transformed, so odds ratio is the change per 10-fold change in study population.

<sup>5</sup>Journal impact factor was base 2 log-transformed, so odds ratio is the change per 2-fold change in journal impact factor.

Table S6: Subgroup analysis for evidence assessment units (n=7) showing a neutral effect or association of LES on BW (n=48 articles cited)

|                                                             | n (%) <sup>1</sup> | OR (95% CI)      | P-value     |
|-------------------------------------------------------------|--------------------|------------------|-------------|
| <b>Main message of cited articles</b>                       |                    |                  |             |
| Neutral (no directional effect or association)              | 19 (40)            | 1 (ref)          |             |
| Unable to draw a conclusion from the article                | 3 (6)              | 1.67 (1.07-2.54) | <b>0.03</b> |
| Evidence is insufficient to draw a conclusion               | 2 (4)              | 1.45 (0.84-2.43) | 0.17        |
| Increase/less beneficial                                    | 9 (19)             | 1.25 (0.92-1.70) | 0.15        |
| Decrease/more beneficial                                    | 11 (23)            | 1.08 (0.80-1.45) | 0.60        |
| No conclusion directly relevant to the LES- BW relationship | 4 (8)              | 0.89 (0.56-1.38) | 0.61        |
| <b>Cited article type</b>                                   |                    |                  |             |
| Systematic review with meta-analysis                        | 8 (17)             | 1 (ref)          |             |
| Observational study                                         | 22 (46)            | 1.45 (1.06-2.02) | <b>0.03</b> |
| Randomized controlled trial                                 | 18 (38)            | 1.13 (0.81-1.60) | 0.48        |
| Animal                                                      | -                  | -                | -           |
| Other                                                       | -                  | -                | -           |
| Systematic review without meta-analysis                     | -                  | -                | -           |
| Narrative review                                            | -                  | -                | -           |
| <b>Cited article population<sup>2</sup></b>                 |                    |                  |             |
| Adults                                                      | 26 (54)            | 1 (ref)          |             |
| Children                                                    | 16 (33)            | 1.12 (0.88-1.44) | 0.36        |
| Both                                                        | 6 (13)             | 0.81 (0.55-1.18) | 0.29        |
| <b>Sample size<sup>3,4</sup></b>                            | 4 (8)              | 1.09 (0.96-1.23) | 0.18        |
| <b>Number of authors</b>                                    | 48 (100)           | 0.97 (0.93-1.00) | 0.06        |
| <b>Journal impact factor, current (2018)<sup>5</sup></b>    | 46 (96)            | 1.03 (0.94-1.13) | 0.47        |
| <b>Journal impact factor, last five years<sup>5</sup></b>   | 48 (100)           | 1.02 (0.93-1.12) | 0.64        |
| <b>Years since cited article was published</b>              | 48 (100)           | 1.00 (0.99-1.01) | 0.78        |

BW; body weight, CI; 95% confidence interval, LES; low-energy sweetener, n; sample size, OR; Odds ratio, ref; reference variable. Logistic mixed-effects regression. The analysis is additionally adjusted for overdispersion.

<sup>1</sup>Cited articles can potentially be cited in all evidence assessment units. The aggregated number for subgroups is therefore higher than the total number of cited articles.

<sup>2</sup>Data on population was only extracted for articles considering human subjects.

<sup>3</sup>Data on sample size was only extracted for primary evidence (i.e. not for reviews).

<sup>4</sup>Sample size was base 10 log-transformed, so odds ratio is the change per 10-fold change in study population.

<sup>5</sup>Journal impact factor was base 2 log-transformed, so odds ratio is the change per 2-fold change in journal impact factor.

Table S7: Subgroup analysis for evidence assessment units (n=7) showing an adverse effect or association of LES on BW (n=63 articles cited)

|                                                             | n (%) <sup>1</sup> | OR (95% CI)      | P-value |
|-------------------------------------------------------------|--------------------|------------------|---------|
| <b>Main message of cited articles</b>                       |                    |                  |         |
| Neutral (no directional effect or association)              | 9 (14)             | 1 (ref)          |         |
| No conclusion directly relevant to the LES- BW relationship | 6 (10)             | 1.29 (0.62-2.65) | 0.49    |
| Increase/less beneficial                                    | 35 (56)            | 1.09 (0.65-1.90) | 0.75    |
| Decrease/more beneficial                                    | 6 (10)             | 0.95 (0.43-2.01) | 0.89    |
| Evidence is insufficient to draw a conclusion               | 6 (10)             | 0.79 (0.35-1.72) | 0.56    |
| Unable to draw a conclusion from the article                | 1 (2)              | 0.79 (0.11-3.33) | 0.78    |
| <b>Cited article type</b>                                   |                    |                  |         |
| Systematic review with meta-analysis                        | 4 (6)              | 1 (ref)          |         |
| Animal                                                      | 12 (19)            | 1.43 (0.72-3.15) | 0.34    |
| Observational study                                         | 33 (52)            | 1.34 (0.72-2.85) | 0.40    |
| Randomized controlled trial                                 | 6 (10)             | 1.17 (0.52-2.77) | 0.71    |
| Systematic review without meta-analysis                     | 2 (3)              | 1.00 (0.29-2.98) | 1.00    |
| Narrative review                                            | 6 (10)             | 1.00 (0.43-2.41) | 1.00    |
| Other                                                       | -                  | -                | -       |
| <b>Cited article population<sup>2</sup></b>                 |                    |                  |         |
| Adults                                                      | 19 (30)            | 1 (ref)          |         |
| Both                                                        | 9 (14)             | 0.87 (0.53-1.39) | 0.57    |
| Children                                                    | 22 (35)            | 0.80 (0.55-1.15) | 0.24    |
| <b>Sample size<sup>3,4</sup></b>                            | 39 (62)            | 1.14 (0.91-1.44) | 0.25    |
| <b>Number of authors</b>                                    | 63 (100)           | 1.04 (1.00-1.09) | 0.07    |
| <b>Journal impact factor, current (2018)<sup>5</sup></b>    | 63 (100)           | 1.13 (0.97-1.30) | 0.12    |
| <b>Journal impact factor, last five years<sup>5</sup></b>   | 63 (100)           | 1.13 (0.97-1.32) | 0.12    |
| <b>Years since cited article was published</b>              | 63 (100)           | 1.00 (0.96-1.04) | 0.92    |

BW; body weight, CI; 95% confidence interval, LES; low-energy sweetener, n; sample size, OR; Odds ratio, ref; reference variable. Logistic mixed-effects regression. The analysis is additionally adjusted for overdispersion.

<sup>1</sup>Cited articles can potentially be cited in all evidence assessment units. The aggregated number for subgroups is therefore higher than the total number of cited articles.

<sup>2</sup>Data on population was only extracted for articles considering human subjects.

<sup>3</sup>Data on sample size was only extracted for primary evidence (i.e. not for reviews).

<sup>4</sup>Sample size was base 10 log-transformed, so odds ratio is the change per 10-fold change in study population.

<sup>5</sup>Journal impact factor was base 2 log-transformed, so odds ratio is the change per 2-fold change in journal impact factor.

Table S8: Subgroup analysis for evidence assessment units (n=26) concluding insufficient evidence to draw a conclusion about the effect of LES on BW (n=126 articles cited)

|                                                             | n (%) <sup>1</sup> | OR (95% CI)      | P-value          |
|-------------------------------------------------------------|--------------------|------------------|------------------|
| <b>Main message of cited articles</b>                       |                    |                  |                  |
| Neutral (no directional effect or association)              | 29 (23)            | 1 (ref)          |                  |
| Evidence is insufficient to draw a conclusion               | 12 (10)            | 1.45 (0.96-2.15) | 0.07             |
| No conclusion directly relevant to the LES- BW relationship | 15 (12)            | 0.89 (0.58-1.35) | 0.60             |
| Increase/less beneficial                                    | 36 (29)            | 0.88 (0.63-1.22) | 0.45             |
| Decrease/more beneficial                                    | 28 (22)            | 0.80 (0.56-1.14) | 0.22             |
| Unable to draw a conclusion from the article                | 4 (3)              | 0.65 (0.27-1.37) | 0.30             |
| <b>Cited article type</b>                                   |                    |                  |                  |
| Systematic review with meta-analysis                        | 12 (10)            | 1 (ref)          |                  |
| Systematic review without meta-analysis                     | 6 (5)              | 1.97 (1.12-3.45) | <b>0.02</b>      |
| Observational study                                         | 53 (42)            | 1.03 (0.69-1.59) | 0.89             |
| Randomized controlled trial                                 | 42 (33)            | 0.82 (0.54-1.29) | 0.38             |
| Animal                                                      | 3 (2)              | 0.78 (0.29-1.83) | 0.60             |
| Narrative review                                            | 8 (6)              | 0.73 (0.37-1.37) | 0.34             |
| Other                                                       | -                  | -                | -                |
| <b>Cited article population<sup>2</sup></b>                 |                    |                  |                  |
| Adults                                                      | 66 (52)            | 1 (ref)          |                  |
| Children                                                    | 39 (31)            | 1.84 (1.43-2.37) | <b>&lt;0.001</b> |
| Both                                                        | 16 (13)            | 0.83 (0.53-1.25) | 0.38             |
| <b>Sample size<sup>3,4</sup></b>                            | 96 (76)            | 1.10 (0.98-1.25) | 0.11             |
| <b>Number of authors</b>                                    | 125 (99)           | 1.00 (0.97-1.04) | 0.92             |
| <b>Journal impact factor, current (2018)<sup>5</sup></b>    | 124 (98)           | 1.10 (1.00-1.20) | <b>0.049</b>     |
| <b>Journal impact factor, last five years<sup>5</sup></b>   | 123 (98)           | 1.10 (0.99-1.21) | 0.06             |
| <b>Years since cited article was published</b>              | 126 (100)          | 1.00 (0.99-1.02) | 0.77             |

BW; body weight, CI; 95% confidence interval, LES; low-energy sweetener, n; sample size, OR; Odds ratio, ref; reference variable. Logistic mixed-effects regression.

<sup>1</sup>Cited articles can potentially be cited in all evidence assessment units. The aggregated number for subgroups is therefore higher than the total number of cited articles.

<sup>2</sup>Data on population was only extracted for articles considering human subjects.

<sup>3</sup>Data on sample size was only extracted for primary evidence (i.e. not for reviews).

<sup>4</sup>Sample size was base 10 log-transformed, so odds ratio is the change per 10-fold change in study population.

<sup>5</sup>Journal impact factor was base 2 log-transformed, so odds ratio is the change per 2-fold change in journal impact factor.

Table S9: Subgroup analysis for articles cited (n=112) in narrative reviews (n=26 evidence assessment units)

|                                                             | n (%) <sup>1</sup> | OR (95% CI)      | P-value |
|-------------------------------------------------------------|--------------------|------------------|---------|
| <b>Main message of cited articles</b>                       |                    |                  |         |
| Neutral (no directional effect or association)              | 20 (18)            | 1 (ref)          |         |
| Decrease/more beneficial                                    | 21 (19)            | 1.13 (0.75-1.70) | 0.57    |
| Increase/less beneficial                                    | 38 (34)            | 1.10 (0.76-1.59) | 0.63    |
| No conclusion directly relevant to the LES- BW relationship | 17 (15)            | 0.76 (0.47-1.21) | 0.25    |
| Evidence is insufficient to draw a conclusion               | 12 (11)            | 0.73 (0.42-1.22) | 0.24    |
| Unable to draw a conclusion from the article                | 3 (3)              | 0.54 (0.16-1.39) | 0.26    |
| <b>Cited article type</b>                                   |                    |                  |         |
| Systematic review with meta-analysis                        | 13 (12)            | 1 (ref)          |         |
| Randomized controlled trial                                 | 20 (18)            | 1.00 (0.64-1.58) | 0.99    |
| Animal                                                      | 13 (12)            | 0.84 (0.50-1.41) | 0.52    |
| Observational study                                         | 48 (43)            | 0.81 (0.55-1.23) | 0.31    |
| Narrative review                                            | 14 (13)            | 0.64 (0.37-1.09) | 0.10    |
| Systematic review without meta-analysis                     | 3 (3)              | 0.47 (1.14-1.22) | 0.16    |
| Other                                                       | -                  | -                | -       |
| <b>Cited article population<sup>2</sup></b>                 |                    |                  |         |
| Adults                                                      | 41 (37)            | 1 (ref)          |         |
| Children                                                    | 31 (28)            | 1.24 (0.90-1.70) | 0.18    |
| Both                                                        | 25 (22)            | 0.93 (0.64-1.32) | 0.68    |
| <b>Sample size<sup>3,4</sup></b>                            | 69 (62)            | 0.87 (0.74-1.00) | 0.06    |
| <b>Number of authors</b>                                    | 112 (100)          | 1.03 (0.99-1.06) | 0.16    |
| <b>Journal impact factor, current (2018)<sup>5</sup></b>    | 109 (97)           | 1.06 (0.95-1.18) | 0.26    |
| <b>Journal impact factor, last five years<sup>5</sup></b>   | 111 (99)           | 1.04 (0.93-1.16) | 0.47    |
| <b>Years since cited article was published</b>              | 112 (100)          | 1.01 (0.99-1.03) | 0.22    |

BW; body weight, CI; 95% confidence interval, LES; low-energy sweetener, n; sample size, OR; Odds ratio, ref; reference variable. Logistic mixed-effects regression.

<sup>1</sup>Cited articles can potentially be cited in all evidence assessment units. The aggregated number for subgroups is therefore higher than the total number of cited articles.

<sup>2</sup>Data on population was only extracted for articles considering human subjects.

<sup>3</sup>Data on sample size was only extracted for primary evidence (i.e. not for reviews).

<sup>4</sup>Sample size was base 10 log-transformed, so odds ratio is the change per 10-fold change in study population.

<sup>5</sup>Journal impact factor was base 2 log-transformed, so odds ratio is the change per 2-fold change in journal impact factor.

Table S10: Subgroup analysis for articles cited (n=56) in systematic reviews with meta-analysis (n=11 evidence assessment units)

|                                                             | n (%) <sup>1</sup> | OR (95% CI)      | P-value |
|-------------------------------------------------------------|--------------------|------------------|---------|
| <b>Main message of cited articles</b>                       |                    |                  |         |
| Neutral (no directional effect or association)              | 21 (38)            | 1 (ref)          |         |
| Decrease/more beneficial                                    | 13 (23)            | 1.50 (0.85-2.64) | 0.16    |
| Unable to draw a conclusion from the article                | 3 (5)              | 1.43 (0.50-3.56) | 0.46    |
| No conclusion directly relevant to the LES- BW relationship | 3 (5)              | 1.15 (0.37-2.99) | 0.79    |
| Increase/less beneficial                                    | 15 (27)            | 1.10 (0.61-1.95) | 0.75    |
| Evidence is insufficient to draw a conclusion               | 1 (2)              | 0.65 (0.03-3.55) | 0.68    |
| <b>Cited article type</b>                                   |                    |                  |         |
| Randomized controlled trial                                 | 29 (52)            | 1 (ref)          |         |
| Observational study                                         | 27 (48)            | 0.94 (0.60-1.45) | 0.77    |
| Animal                                                      | -                  | -                | -       |
| Other                                                       | -                  | -                | -       |
| Systematic review with meta-analysis                        | -                  | -                | -       |
| Systematic review without meta-analysis                     | -                  | -                | -       |
| Narrative review                                            | -                  | -                | -       |
| <b>Cited article population<sup>2</sup></b>                 |                    |                  |         |
| Adults                                                      | 34 (61)            | 1 (ref)          |         |
| Children                                                    | 22 (39)            | 0.86 (0.54-1.34) | 0.50    |
| Both                                                        | -                  | -                | -       |
| <b>Sample size<sup>3,4</sup></b>                            | 56 (100)           | 0.97 (0.78-1.20) | 0.81    |
| <b>Number of authors</b>                                    | 56 (100)           | 0.95 (0.88-1.04) | 0.27    |
| <b>Journal impact factor, current (2018)<sup>5</sup></b>    | 56 (100)           | 1.11 (0.92-1.31) | 0.26    |
| <b>Journal impact factor, last five years<sup>5</sup></b>   | 56 (100)           | 1.11 (0.91-1.33) | 0.28    |
| <b>Years since cited article was published</b>              | 56 (100)           | 1.01 (0.99-1.03) | 0.39    |

BW; body weight, CI; 95% confidence interval, LES; low-energy sweetener, n; sample size, OR; Odds ratio, ref; reference variable. Logistic mixed-effects regression.

<sup>1</sup>Cited articles can potentially be cited in all evidence assessment units. The aggregated number for subgroups is therefore higher than the total number of cited articles.

<sup>2</sup>Data on population was only extracted for articles considering human subjects.

<sup>3</sup>Data on sample size was only extracted for primary evidence (i.e. not for reviews).

<sup>4</sup>Sample size was base 10 log-transformed, so odds ratio is the change per 10-fold change in study population.

<sup>5</sup>Journal impact factor was base 2 log-transformed, so odds ratio is the change per 2-fold change in journal impact factor.

Table S11: Subgroup analysis for articles cited (n=116) in systematic reviews without meta-analysis (n=14 evidence assessment units)

|                                                             | n (%) <sup>1</sup> | OR (95% CI)      | P-value      |
|-------------------------------------------------------------|--------------------|------------------|--------------|
| <b>Main message of cited articles</b>                       |                    |                  |              |
| Neutral (no directional effect or association)              | 29 (25)            | 1 (ref)          |              |
| Evidence is insufficient to draw a conclusion               | 13 (11)            | 1.19 (0.71-1.94) | 0.51         |
| No conclusion directly relevant to the LES- BW relationship | 11 (9)             | 1.13 (0.65-1.92) | 0.65         |
| Decrease/more beneficial                                    | 28 (24)            | 1.06 (0.71-1.61) | 0.77         |
| Increase/less beneficial                                    | 28 (24)            | 1.02 (0.67-1.54) | 0.93         |
| Unable to draw a conclusion from the article                | 4 (3)              | 0.52 (0.15-1.35) | 0.23         |
| <b>Cited article type</b>                                   |                    |                  |              |
| Systematic review with meta-analysis                        | 11 (9)             | 1 (ref)          |              |
| Systematic review without meta-analysis                     | 8 (7)              | 0.92 (0.48-1.74) | 0.80         |
| Observational study                                         | 49 (42)            | 0.67 (0.43-1.08) | 0.09         |
| Randomized controlled trial                                 | 39 (34)            | 0.61 (0.38-1.00) | <b>0.04</b>  |
| Narrative review                                            | 4 (3)              | 0.54 (0.19-1.30) | 0.20         |
| Animal                                                      | 1 (1)              | 0.35 (0.02-1.85) | 0.32         |
| Other                                                       | 1 (1)              | 0.35 (0.02-1.85) | 0.32         |
| <b>Cited article population<sup>2</sup></b>                 |                    |                  |              |
| Adults                                                      | 62 (53)            | 1 (ref)          |              |
| Both                                                        | 14 (12)            | 1.86 (1.20-2.82) | <b>0.004</b> |
| Children                                                    | 36 (31)            | 1.66 (1.20-2.29) | <b>0.002</b> |
| <b>Sample size<sup>3,4</sup></b>                            | 88 (76)            | 1.03 (0.88-1.20) | 0.74         |
| <b>Number of authors</b>                                    | 114 (98)           | 1.02 (0.98-1.07) | 0.33         |
| <b>Journal impact factor, current (2018)<sup>5</sup></b>    | 113 (97)           | 1.06 (0.95-1.19) | 0.29         |
| <b>Journal impact factor, last five years<sup>5</sup></b>   | 112 (97)           | 1.06 (0.94-1.19) | 0.33         |
| <b>Years since cited article was published</b>              | 116 (100)          | 1.00 (0.98-1.01) | 0.69         |

BW; body weight, CI; 95% confidence interval, LES; low-energy sweetener, n; sample size, OR; Odds ratio, ref; reference variable. Logistic mixed-effects regression.

<sup>1</sup>Cited articles can potentially be cited in all evidence assessment units. The aggregated number for subgroups is therefore higher than the total number of cited articles.

<sup>2</sup>Data on population was only extracted for articles considering human subjects.

<sup>3</sup>Data on sample size was only extracted for primary evidence (i.e. not for reviews).

<sup>4</sup>Sample size was base 10 log-transformed, so odds ratio is the change per 10-fold change in study population.

<sup>5</sup>Journal impact factor was base 2 log-transformed, so odds ratio is the change per 2-fold change in journal impact factor.

Table S12: Subgroup analysis of articles cited 5 or more times (n=45) across all evidence assessment units (n = 51)

|                                                             | n (%)    | OR (95% CI)      | P-value      |
|-------------------------------------------------------------|----------|------------------|--------------|
| <b>Main message of cited articles</b>                       |          |                  |              |
| Neutral (no directional effect or association)              | 15 (33)  | 1 (ref)          |              |
| Evidence is insufficient to draw a conclusion               | 2 (4)    | 1.39 (0.79-2.34) | 0.23         |
| Increase/less beneficial                                    | 11 (24)  | 1.27 (0.94-1.71) | 0.12         |
| Decrease/more beneficial                                    | 16 (36)  | 1.25 (0.95-1.64) | 0.11         |
| No conclusion directly relevant to the LES- BW relationship | 1 (2)    | 0.66 (0.23-1.55) | 0.39         |
| We are unable to draw a conclusion from the paper           | -        | -                | -            |
| <b>Cited article type</b>                                   |          |                  |              |
| Systematic review with meta-analysis                        | 6 (13)   | 1 (ref)          |              |
| Observational study                                         | 22 (49)  | 1.15 (0.81-1.65) | 0.45         |
| Randomized controlled trial                                 | 17 (38)  | 1.10 (0.77-1.60) | 0.62         |
| Animal                                                      | -        | -                | -            |
| Other                                                       | -        | -                | -            |
| Systematic review without meta-analysis                     | -        | -                | -            |
| Narrative review                                            | -        | -                | -            |
| <b>Cited article population<sup>1</sup></b>                 |          |                  |              |
| Adults                                                      | 19 (42)  | 1 (ref)          |              |
| Children                                                    | 20 (44)  | 1.04 (0.82-1.31) | 0.77         |
| Both                                                        | 6 (13)   | 0.91 (0.63-1.29) | 0.59         |
| <b>Sample size<sup>2,3</sup></b>                            | 39 (87)  | 1.06 (0.94-1.20) | 0.31         |
| <b>Number of authors</b>                                    | 45 (100) | 0.98 (0.94-1.01) | 0.24         |
| <b>Journal impact factor<sup>4</sup></b>                    | 45 (100) | 1.13 (1.04-1.22) | <b>0.003</b> |
| <b>Journal impact factor, last five years<sup>4</sup></b>   | 45 (100) | 1.13 (1.03-1.22) | 0.006        |
| <b>Years since cited article was published</b>              | 45 (100) | 1.00 (0.99-1.01) | 0.88         |

BW; body weight, CI; 95% confidence interval, LES; low-energy sweetener, n; sample size, OR; Odds ratio, ref; reference variable. Logistic mixed-effects regression.

<sup>1</sup>Data on population was only extracted for articles considering human subjects.

<sup>2</sup>Data on sample size was only extracted for primary evidence (i.e. not for reviews).

<sup>3</sup>Sample size was base 10 log-transformed, so odds ratio is the change per 10-fold change in study population.

<sup>4</sup>Journal impact factor was base 2 log-transformed, so odds ratio is the change per 2-fold change in journal impact factor.
