# Supplementary material for: Low-energy sweeteners and body weight: a citation network analysis
Source: HighWire-hosted journal article supplement (doi:10.1136/bmjnph-2020-000210), 2021-04-01
Supplement: bmjnph-2020-000210supp005_data_supplement.pdf [file bmjnph-2020-000210supp005_data_supplement.pdf]

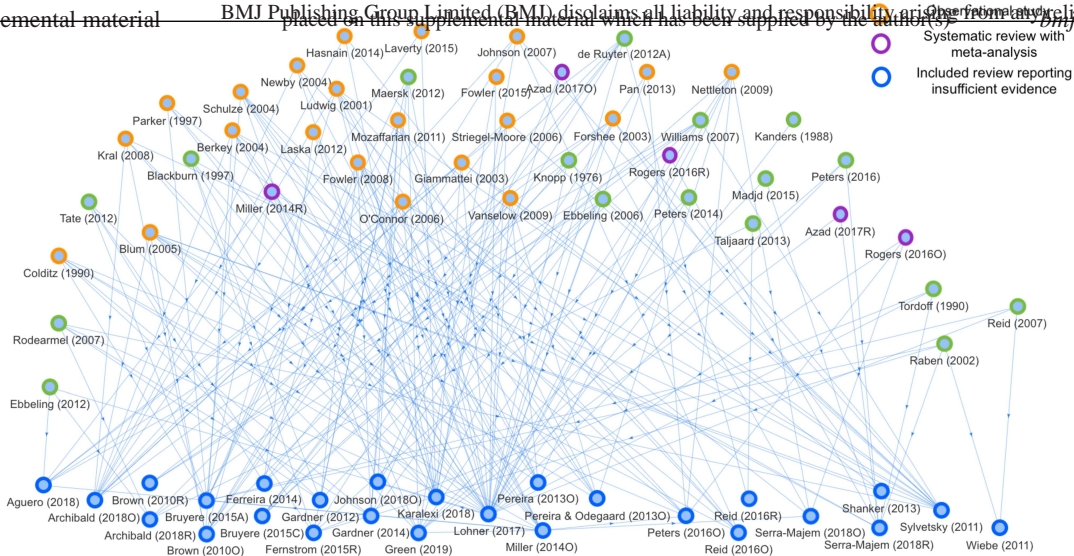

Figure S2: Network analysis based on evidence assessment units reporting insufficient evidence to draw a conclusion of the relationship of low-energy

sweeteners with body weight (n=26). Cited articles (n=74) are marked based on the type of study
