# Supplementary material for: Low-energy sweeteners and body weight: a citation network analysis
Source: PubMed Central journal article supplement — BMJ Nutr Prev Health. 2021 Apr 1;4(1):319–32. doi: 10.1136/bmjnph-2020-000210 (PMC8258071; doi:10.1136/bmjnph-2020-000210), 2021-04-01
Supplement: bmjnph-2020-000210supp007.pdf [file bmjnph-2020-000210supp007.pdf]

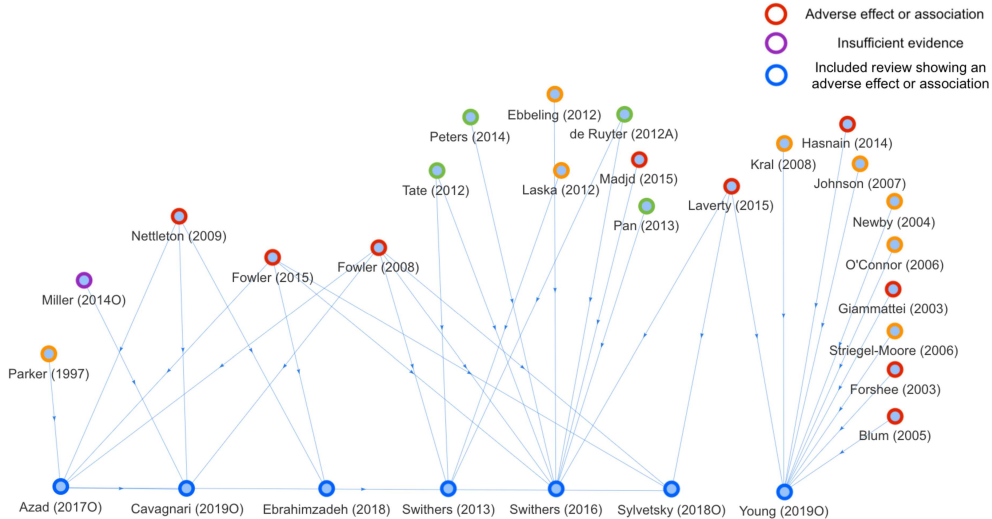

Figure S4: Network analysis based on evidence assessment units concluding an adverse effect or association of low-energy sweeteners with body weight (n=7). Cited articles (n=22) are marked based on the conclusion of the article.
